# Supplementary material
Source: ML conference proceedings conference paper supplement (https://openreview.net/forum?id=oYyEsVz6DX)
Supplement: supplementary_material [file attachment]

## 1 Exemplars of Untrained Network

For an untrained ResNet-50 model, we visualize the features the first channel of various layers is responsive to. We use the same format as Fig. 24 and 25 of the manuscript, i.e., for each unit, we show the 20 least (left) and 20 most (right) activating dataset exemplars.

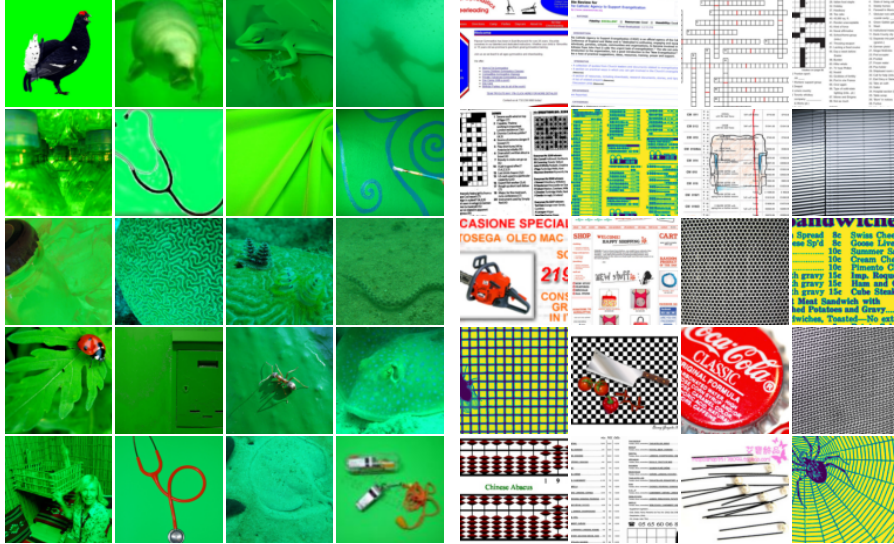

Figure 1: Dataset exemplars yielding low (left) and high (right) activation for unit 0 of layer layer1\_0\_conv1.

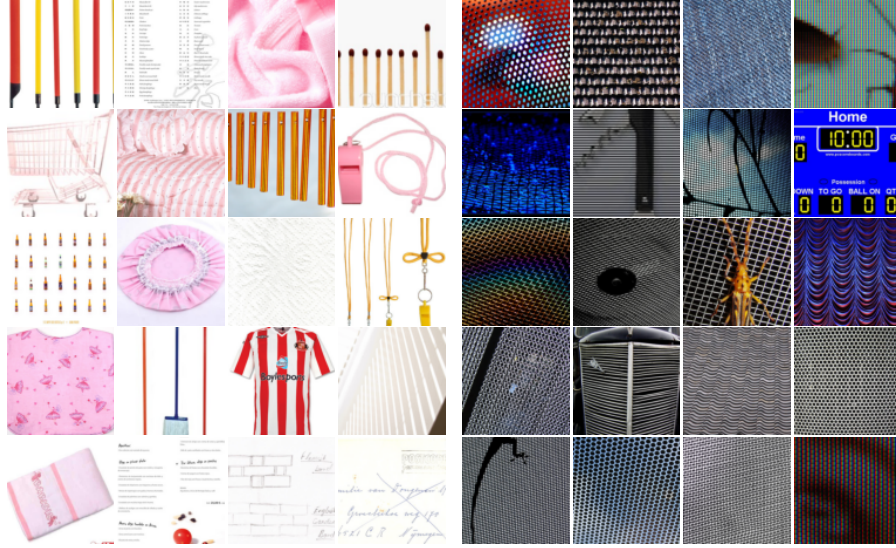

Figure 2: Dataset exemplars yielding low (left) and high (right) activation for unit 0 of layer layer1\_1.conv1.

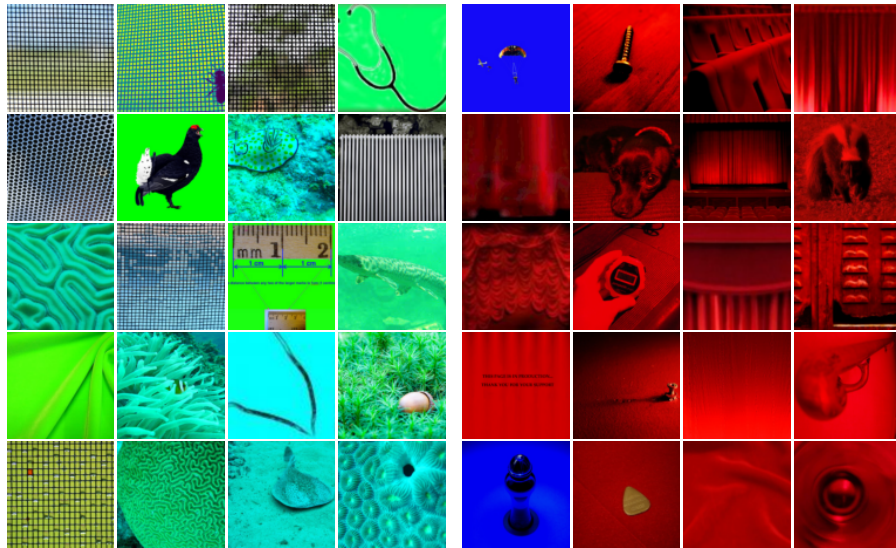

Figure 3: Dataset exemplars yielding low (left) and high (right) activation for unit 0 of layer layer1\_2.conv1.

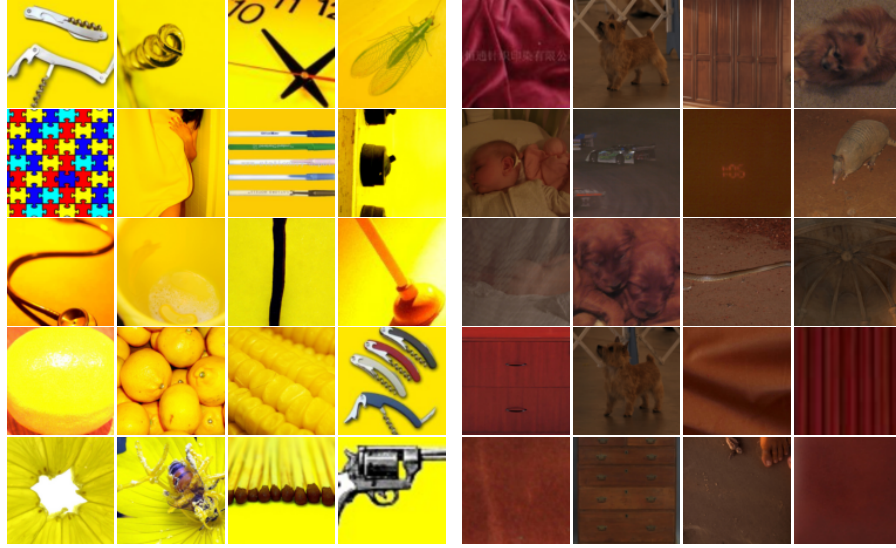

Figure 4: Dataset exemplars yielding low (left) and high (right) activation for unit 0 of layer layer2\_0.conv1.

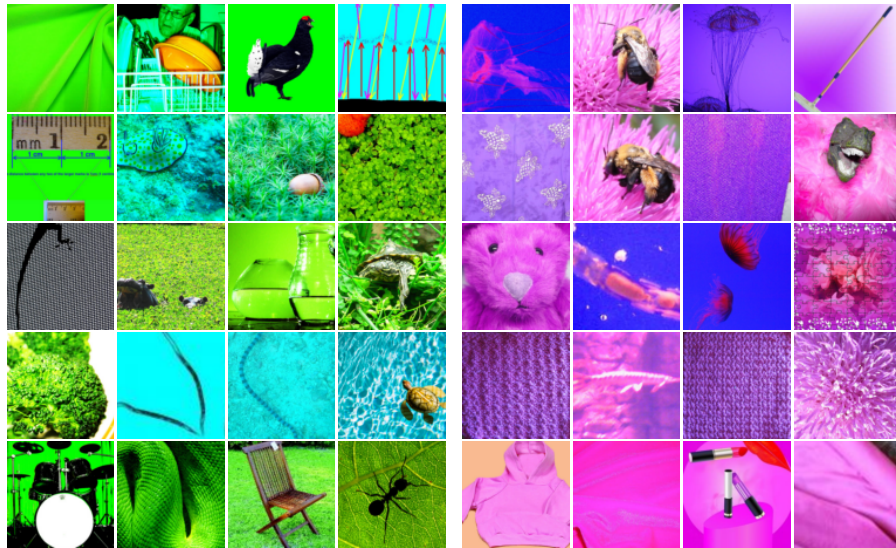

Figure 5: Dataset exemplars yielding low (left) and high (right) activation for unit 0 of layer layer2\_1.conv1.



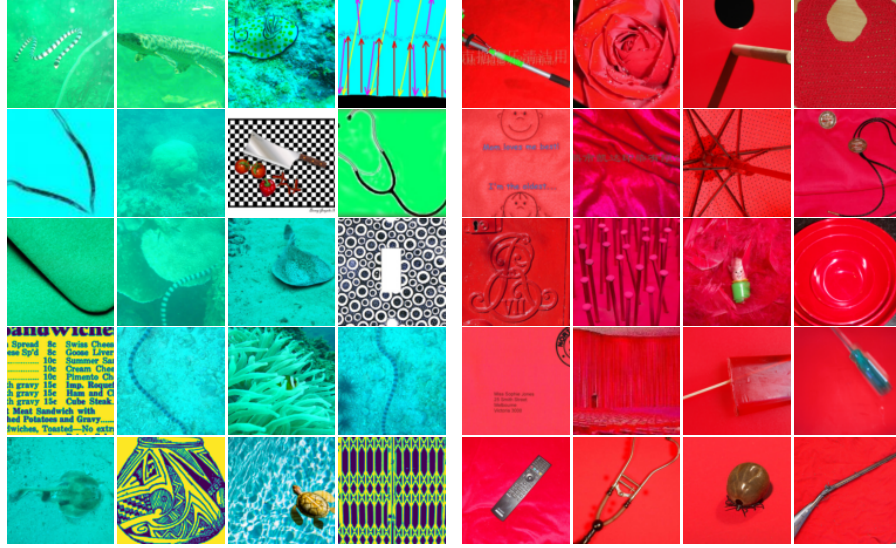

Figure 6: Dataset exemplars yielding low (left) and high (right) activation for unit 0 of layer layer2\_2.conv1.

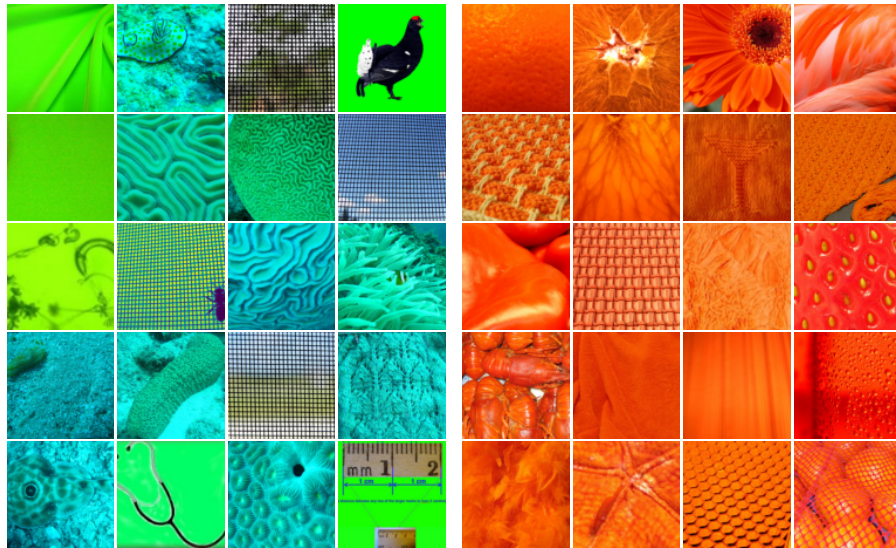

Figure 7: Dataset exemplars yielding low (left) and high (right) activation for unit 0 of layer layer2\_3.conv1.

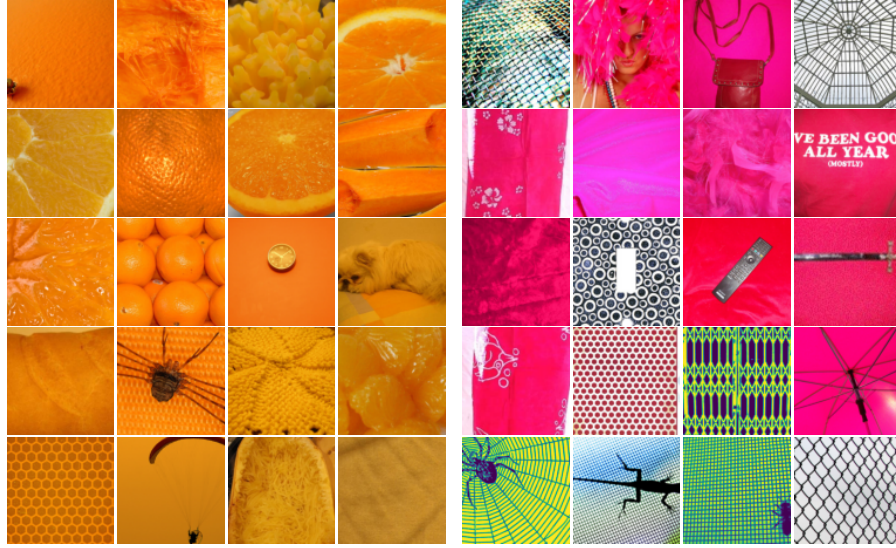

Figure 8: Dataset exemplars yielding low (left) and high (right) activation for unit 0 of layer layer3\_0.conv1.

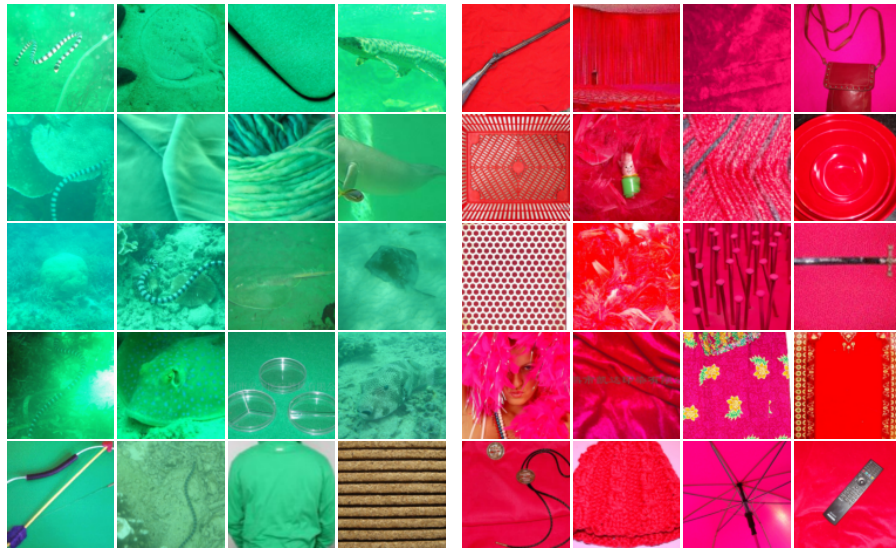

Figure 9: Dataset exemplars yielding low (left) and high (right) activation for unit 0 of layer layer3\_1.conv1.

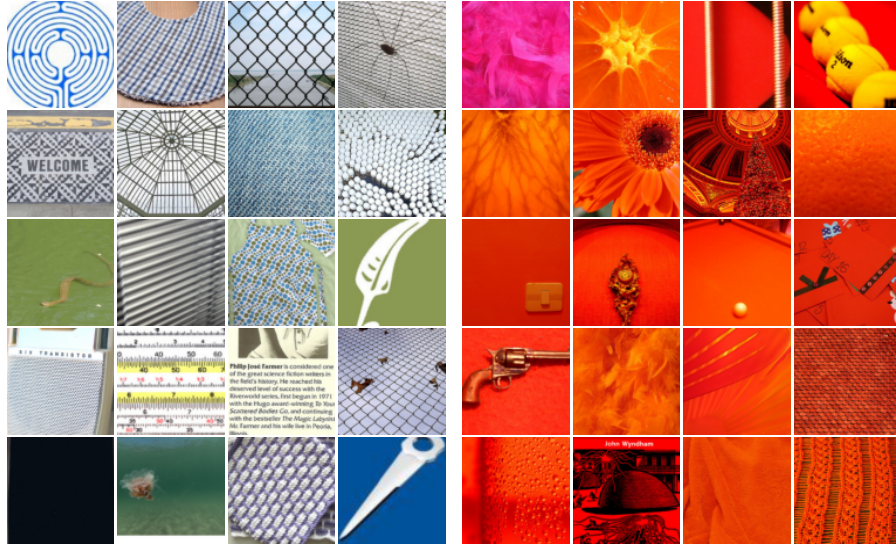

Figure 10: Dataset exemplars yielding low (left) and high (right) activation for unit 0 of layer layer3.2.conv1.
